# Supplementary material for: Multiple Lineages of Usutu Virus (Flaviviridae, Flavivirus) in Blackbirds (Turdus merula) and Mosquitoes (Culex pipiens, Cx. modestus) in the Czech Republic (2016–2019)
Source: PubMed Central journal article supplement (PMC6920817; doi:10.3390/microorganisms7110568), 2019-11-16
Supplement: microorganisms-07-00568-s001.pdf [file microorganisms-07-00568-s001.pdf]

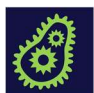

**Table S1.** Primers used for Sanger sequencing of the partial coding sequence of prM and NS4B proteins and complete coding sequences of M, E and NS5 proteins. Some of the published primers were modified according to already obtained sequences. Modifications are indicated by lower case letter.

| Region          | Name      | Sequence             | Ann. temp. | Reference                      |
|-----------------|-----------|----------------------|------------|--------------------------------|
| prM/M/E protein | Usu488f   | GACCATCAACGCGACTGATA | 55°C       | [18]                           |
|                 | Usu1401r  | CAGAGCTGGTAGAACCATGT |            |                                |
|                 | Usu1155f  | CTAGCCACTGTCTCAgATGT | 50°C       | [18] modified                  |
|                 | Usu1608r  | ATGTAGTATGCCTCGGTGTT |            |                                |
|                 | Usu1326f  | GACTCATGGCAACTATTC   | 55°C       | [52]                           |
|                 | Usu1892r  | TCCGTACACATGCTATAGGT |            |                                |
|                 | Usu1537f  | GGTTGAACACCGAGGCATAC | 55°C       | [18]                           |
|                 | Usu2505r  | CTTGTCCACAGCGCAACTCT |            |                                |
| NS4B/NS5        | Usu7314f  | AGAACAGCGGCCGGAATCAT | 55°C       | [18]                           |
|                 | Usu8033r  | GACAAGGTTCCAGCCATAGC |            |                                |
|                 | Usu7757f  | AAGAGGCCATCACTGAAGTC | 55°C       | [18]                           |
|                 | Usu8599r  | TTCCGTGGTAGGTCCAGGTC |            |                                |
|                 | Usu8499f  | ACATaCCAAtCAGGAGAAGA | 55°C       | [52] modified                  |
|                 | Usu9213r  | TTCAACACCTCCTCCAGAAT |            |                                |
|                 | Usu9170f  | AGGACCATTGGTTAGGAAGA | 57°C       | [18]                           |
|                 | Usu9704r  | GGCTTGACAACACAATCATC |            |                                |
|                 | Usu9600f  | GCTGTGAGAACCTGGCTCTT | 50°C       | [18], Usu10292r newly designed |
|                 | Usu10592r | GCAGCACCGTCTACTCAACT |            |                                |

**Table S2.** List of strains and nucleotide sequences of Usutu virus acquired in this study.

| Sample id. nr. | Year of collection | Area of collection | Source                | prM/M/E Genbank acc. nr. | NS4B-NS5 Genbank acc.nr. | Strain identity number in BCCO collection* |
|----------------|--------------------|--------------------|-----------------------|--------------------------|--------------------------|--------------------------------------------|
| 019TM10        | 2017               | Brno               | <i>Turdus merula</i>  | MN395372                 | MN419896                 |                                            |
| 025TM10        | 2017               | Brno               | <i>Turdus merula</i>  | MN395373                 | MN419897                 | BCCO 50_0484 - 85                          |
| 026TM10        | 2017               | Brno               | <i>Turdus merula</i>  | MN395374                 | MN419898                 | BCCO 50_0486 - 87                          |
| 033TM10        | 2017               | Brno               | <i>Turdus merula</i>  | MN395375                 | MN419899                 | BCCO 50_0488 - 89                          |
| 037TM10        | 2017               | Brno               | <i>Turdus merula</i>  | MN395375                 | MN419900                 |                                            |
| 042TM10        | 2017               | Brno               | <i>Turdus merula</i>  | MN395376                 | MN419901                 |                                            |
| 106TM10        | 2017               | Brno               | <i>Turdus merula</i>  | MN395377                 | MN419902                 |                                            |
| 196TM10        | 2018               | Brno               | <i>Turdus merula</i>  | MN395378                 | MN419903                 |                                            |
| 197TM10        | 2018               | Brno               | <i>Turdus merula</i>  | MN395372                 | MN419904                 | BCCO 50_0480 - 81                          |
| 200TM10        | 2018               | Brno               | <i>Turdus merula</i>  | MN395379                 | MN419905                 | BCCO 50_0490 - 91                          |
| 202TM10        | 2018               | Brno               | <i>Turdus merula</i>  | MN395379                 | MN419906                 | BCCO 50_0492 - 93                          |
| 205TM10        | 2018               | Prague             | <i>Turdus merula</i>  | MN395380                 | MN419907                 | BCCO 50_0494 - 95                          |
| 206TM10        | 2018               | Prague             | <i>Turdus merula</i>  | MN395381                 | MN419908                 | BCCO 50_0496 - 97                          |
| 207TM10        | 2018               | Prague             | <i>Turdus merula</i>  | MN395380                 | MN419909                 | BCCO 50_0498 - 99                          |
| 208TM10        | 2018               | Prague             | <i>Turdus merula</i>  | MN395380                 | MN419910                 | BCCO 50_0500 - 01                          |
| 209TM10        | 2018               | Prague             | <i>Turdus merula</i>  | MN395382                 | MN419911                 |                                            |
| 210TM10        | 2018               | Prague             | <i>Turdus merula</i>  | MN395383                 | MN419912                 |                                            |
| 264TM10        | 2017               | Brno               | <i>Turdus merula</i>  | MN395384                 | MN419913                 |                                            |
| 001TM10Bre     | 2018               | Břeclav            | <i>Turdus merula</i>  |                          | MN384964                 |                                            |
| 2Cx_136        | 2018               | South Bohemia      | <i>Culex pipiens</i>  | MN395370                 | MN395369                 |                                            |
| 3Cx16-99       | 2016               | South Moravia      | <i>Culex modestus</i> | MN395371                 | MN419895                 |                                            |

\*[Biology Centre Collections of Organisms: Collection of Arboviruses](#)

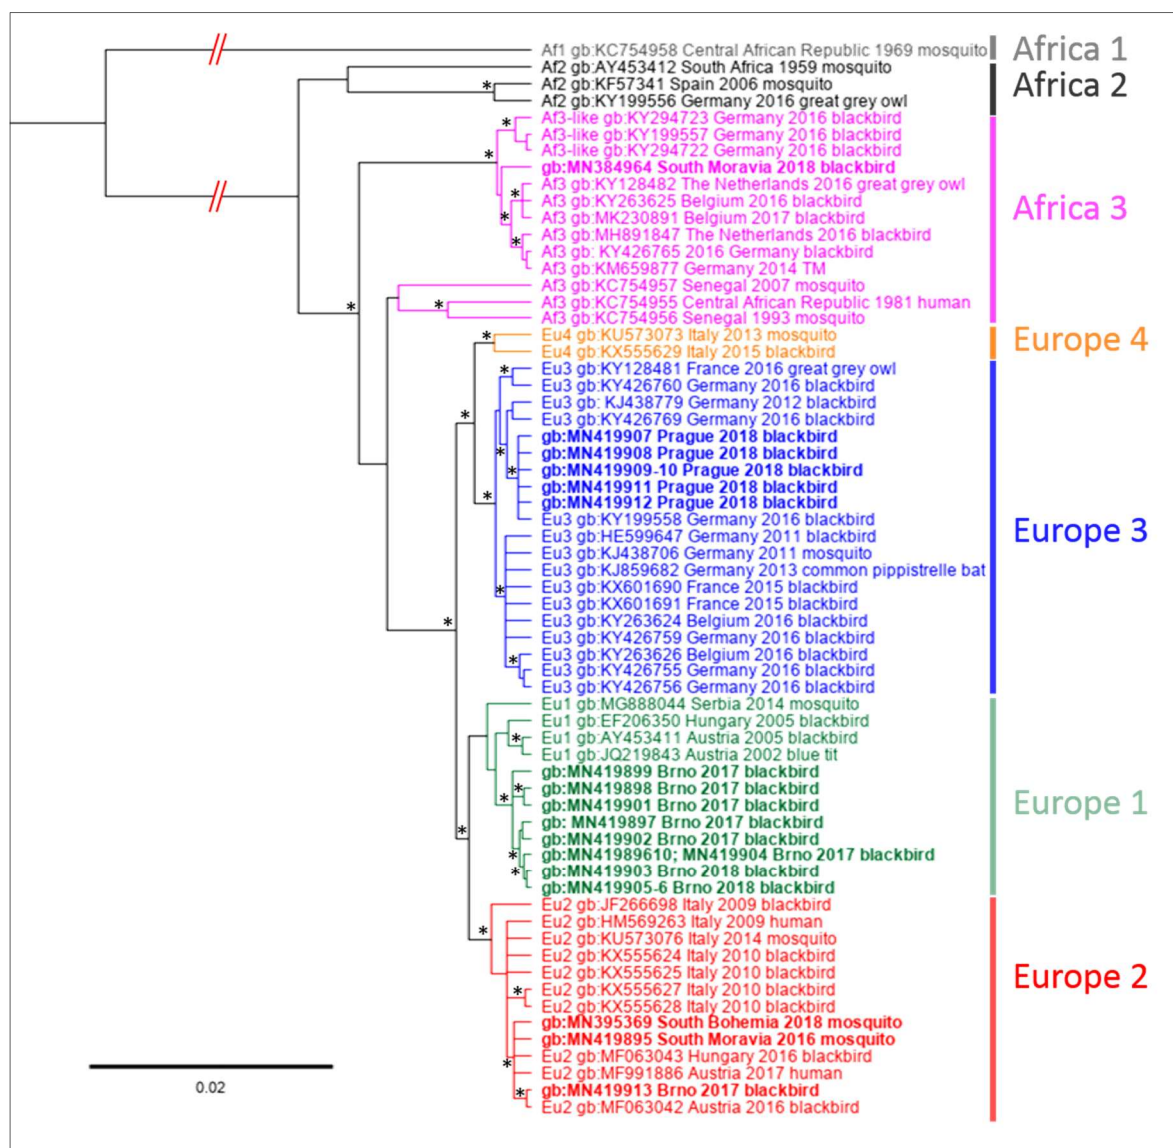

**Figure S1.** Phylogenetic tree based on Bayesian Markov chain Monte Carlo analysis of partial NS4B coding nucleotide sequence and complete coding sequences of NS5 protein of Usutu virus (nucleotide positions 7372-10,398 according to complete genome sequence of Vienna strain, AY453411). Sequence Africa 1, AY453412 was used as outgroup. The code of the sequences consists of GenBank accession number, place and year of origin. The sequences obtained in this study are indicated by bold, individual geographical lineages are color-coded. The tree was generated using GTR+I+G substitution model and 1,000,000 generations. Nodes with Bayesian posterior probability of >95% are indicated by asterisk. The lengths of tree branches correspond to the number of substitutions per site.

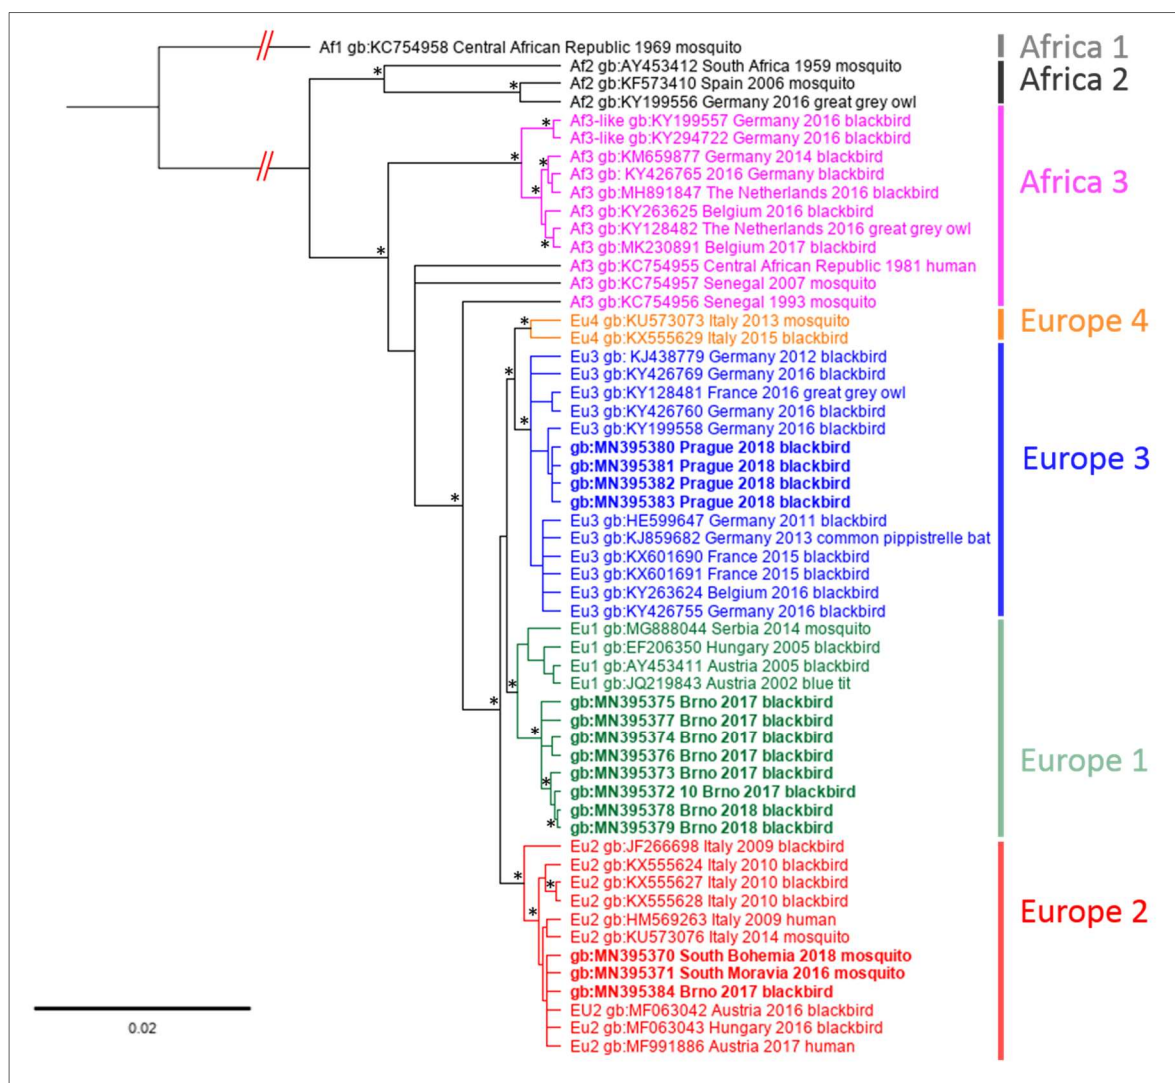

**Figure S2.** Phylogenetic tree based on Bayesian Markov chain Monte Carlo analysis of prM protein and complete coding sequences of M and E proteins of Usutu virus (nucleotide positions 562-2475 according to complete genome sequence of Vienna strain, AY453411). Sequence Africa 1, AY453412 was used as outgroup. The code of the sequences consists of GenBank accession number, place and year of origin. The sequences obtained in this study are indicated by bold, individual geographical lineages are color-coded. The tree was generated using GTR+I substitution model and 1,000,000 generations. Nodes with Bayesian posterior probability of >95% are indicated by asterisk. The lengths of tree branches correspond to the number of substitutions per site.
